# Supplementary material for: Antidepressants fluoxetine and amitriptyline induce alterations in intestinal microbiota and gut microbiome function in rats exposed to chronic unpredictable mild stress
Source: PubMed Central journal article supplement (PMC7892574; doi:10.1038/s41398-021-01254-5), 2021-02-18

Bray-Curtis, PCoA

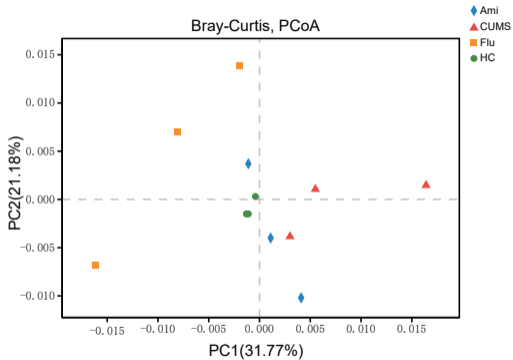

Supplement: 41398_2021_1254_MOESM8_ESM.pdf [file 41398_2021_1254_MOESM8_ESM.pdf]
